# Supplementary material for: How unstable was the environment during the Penultimate Glacial in the South-Western Mediterranean? Vegetation, climate and human dynamics during MIS 6
Source: Copernicus journal article supplement (doi:10.5194/egusphere-2025-5024), 2025-10-21
Supplement: Supplementary file 1 [file Supplementary_S1.pdf › Supplementary_S1.pdf]

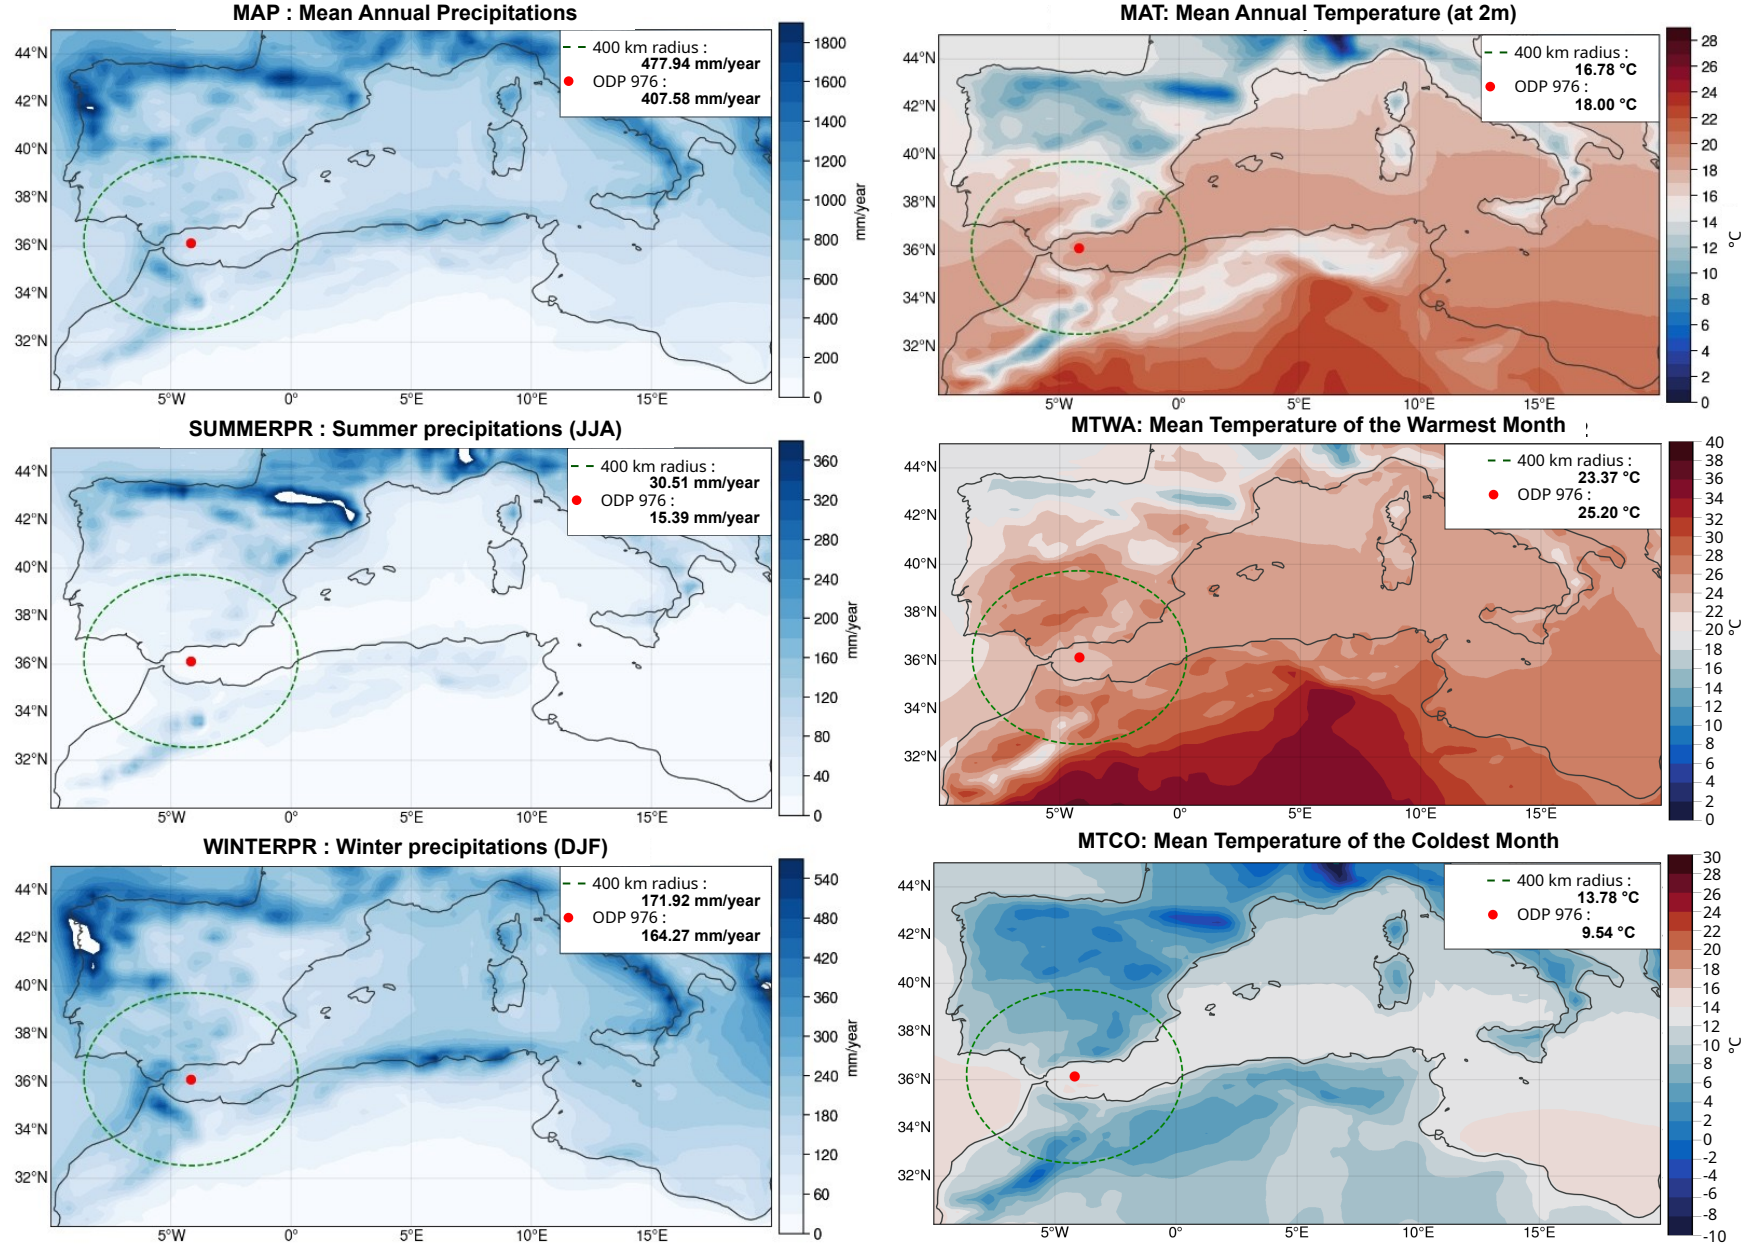

Fig. S1. ERA 5 extraction of ODP 976 modern climate parameters for the period between 1960-2022, ECMRWF (European Centre for Medium-Range Weather Forecasts) (Hersbach et al., 2020).
